# Supplementary material for: Identification of CEACAM5 as a stemness-related inhibitory immune checkpoint in pancreatic cancer
Source: PubMed Central journal article supplement (PMC9733357; doi:10.1186/s12885-022-10397-7), 2022-12-09
Supplement: 12885_2022_10397_MOESM1_ESM.pdf [file 12885_2022_10397_MOESM1_ESM.pdf]

## Additional file 1

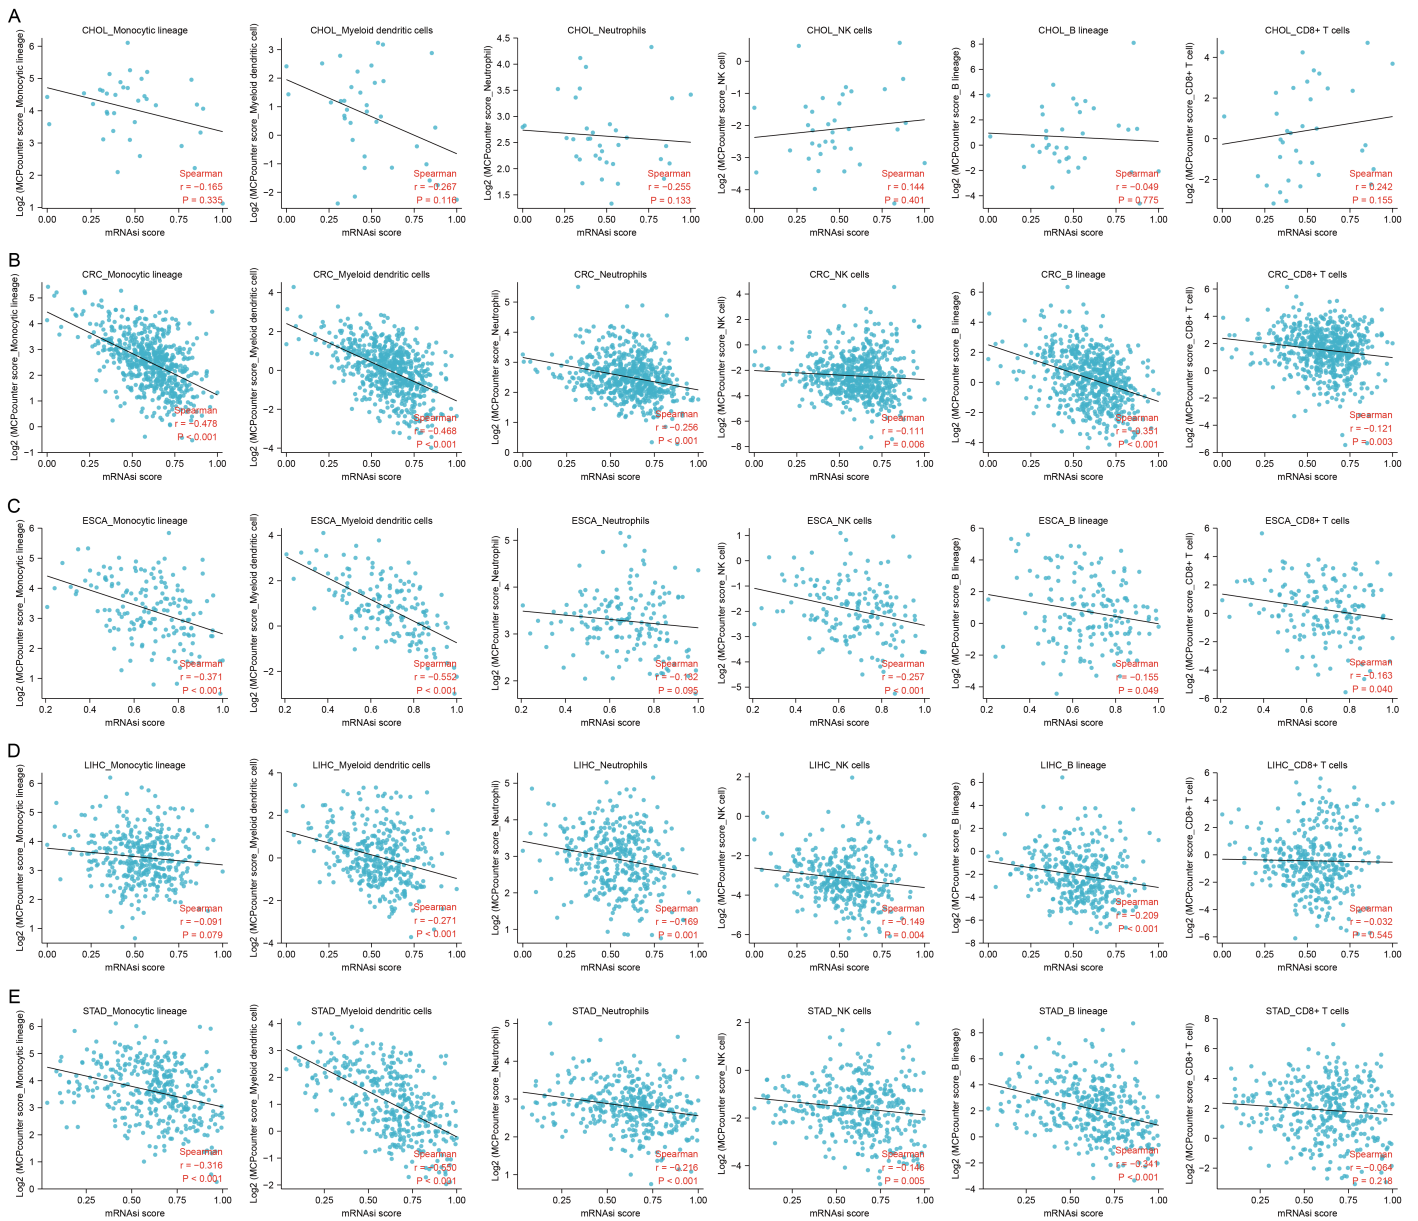

**Fig. S1** Association of cancer stemness with immune infiltrates in five other gastrointestinal cancers. **(A)** Spearman correlation of mRNAasi scores in CHOL with infiltration of monocytic lineage, myeloid dendritic cells, CD8<sup>+</sup> T cells, B lineage, neutrophils and NK cells. **(B)** Spearman correlation of mRNAasi scores in CRC with infiltration of monocytic lineage, myeloid dendritic cells, CD8<sup>+</sup> T cells, B lineage, neutrophils and NK cells. **(C)** Spearman correlation of mRNAasi scores in ESCA with infiltration of monocytic lineage, myeloid dendritic cells, CD8<sup>+</sup> T cells, B lineage, neutrophils and NK cells. **(D)** Spearman correlation of mRNAasi scores in LIHC with infiltration of monocytic lineage, myeloid dendritic cells, CD8<sup>+</sup> T cells, B lineage, neutrophils and NK cells. **(E)** Spearman correlation of mRNAasi scores in STAD with infiltration of monocytic lineage, myeloid dendritic cells, CD8<sup>+</sup> T cells, B lineage, neutrophils and NK cells.
