# Supplementary material for: Identification of CEACAM5 as a stemness-related inhibitory immune checkpoint in pancreatic cancer
Source: PubMed Central journal article supplement (PMC9733357; doi:10.1186/s12885-022-10397-7), 2022-12-09
Supplement: 12885_2022_10397_MOESM2_ESM.pdf [file 12885_2022_10397_MOESM2_ESM.pdf]

## Additional file 2

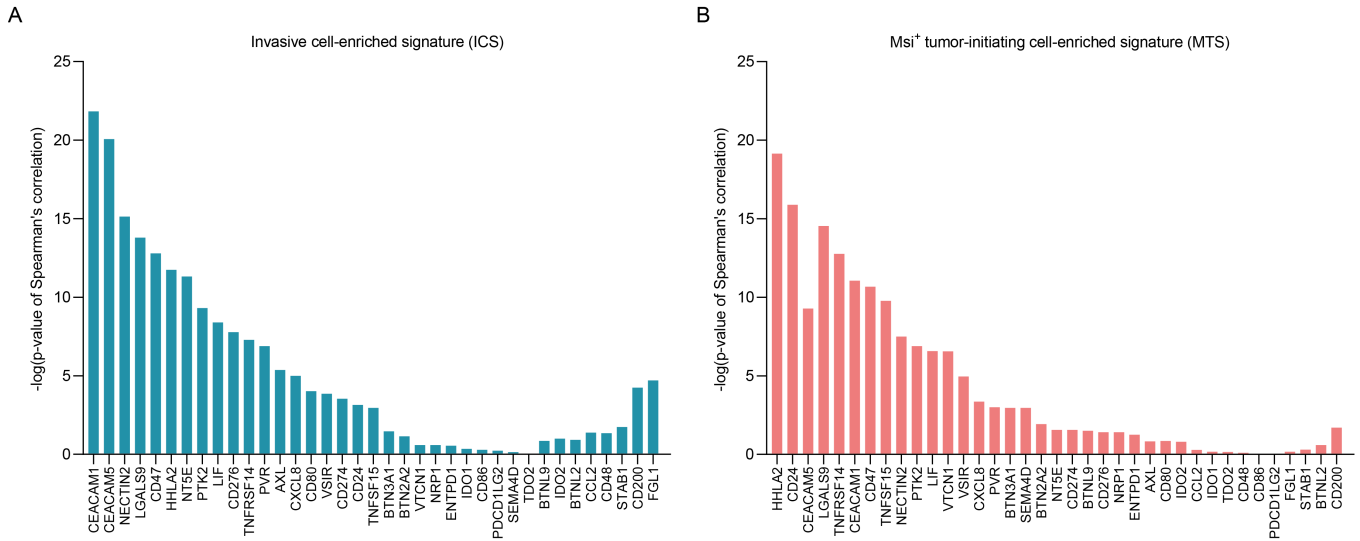

**Fig. S2** Statistical significance of association between the inhibitory immune checkpoints and two individual sets of gene signatures in pancreatic cancer. **(A)** The p-value of Spearman's correlation between the inhibitory immune checkpoints and ICS. **(B)** The p-value of Spearman's correlation between the inhibitory immune checkpoints and MTS.
