# Supplementary material for: Identification of CEACAM5 as a stemness-related inhibitory immune checkpoint in pancreatic cancer
Source: PubMed Central journal article supplement (PMC9733357; doi:10.1186/s12885-022-10397-7), 2022-12-09
Supplement: 12885_2022_10397_MOESM5_ESM.pdf [file 12885_2022_10397_MOESM5_ESM.pdf]

## Additional file 5

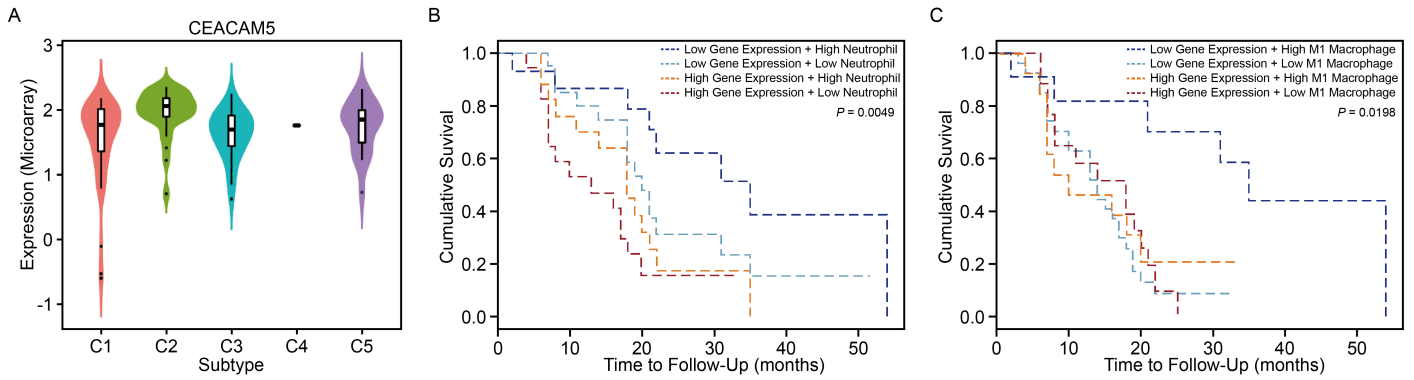

**Fig. S5** Validation using the GSE21501 dataset. **(A)** Violin plots for CEACAM5 expression in multiple immune subtypes of pancreatic cancer ( $P=0.0022$ ). C1, wound healing; C2, IFN- $\gamma$  dominant; C3, inflammatory; C4, lymphocyte depleted; C5, TGF- $\beta$  dominant. **(B)** Kaplan-Meier curves for overall survival split by level of CEACAM5 expression and infiltration level of neutrophils in pancreatic cancer. **(C)** Kaplan-Meier curves for overall survival split by level of CEACAM5 expression and infiltration level of M1 macrophages in pancreatic cancer.
